# Supplementary material for: Strain-specific metastatic phenotypes in pheochromocytoma allograft mice
Source: PubMed Central journal article supplement (PMC6176113; doi:10.1530/erc-18-0136), 2018-07-12
Supplement: erc-25-993-s003.pdf [file erc-25-993-s003.pdf]

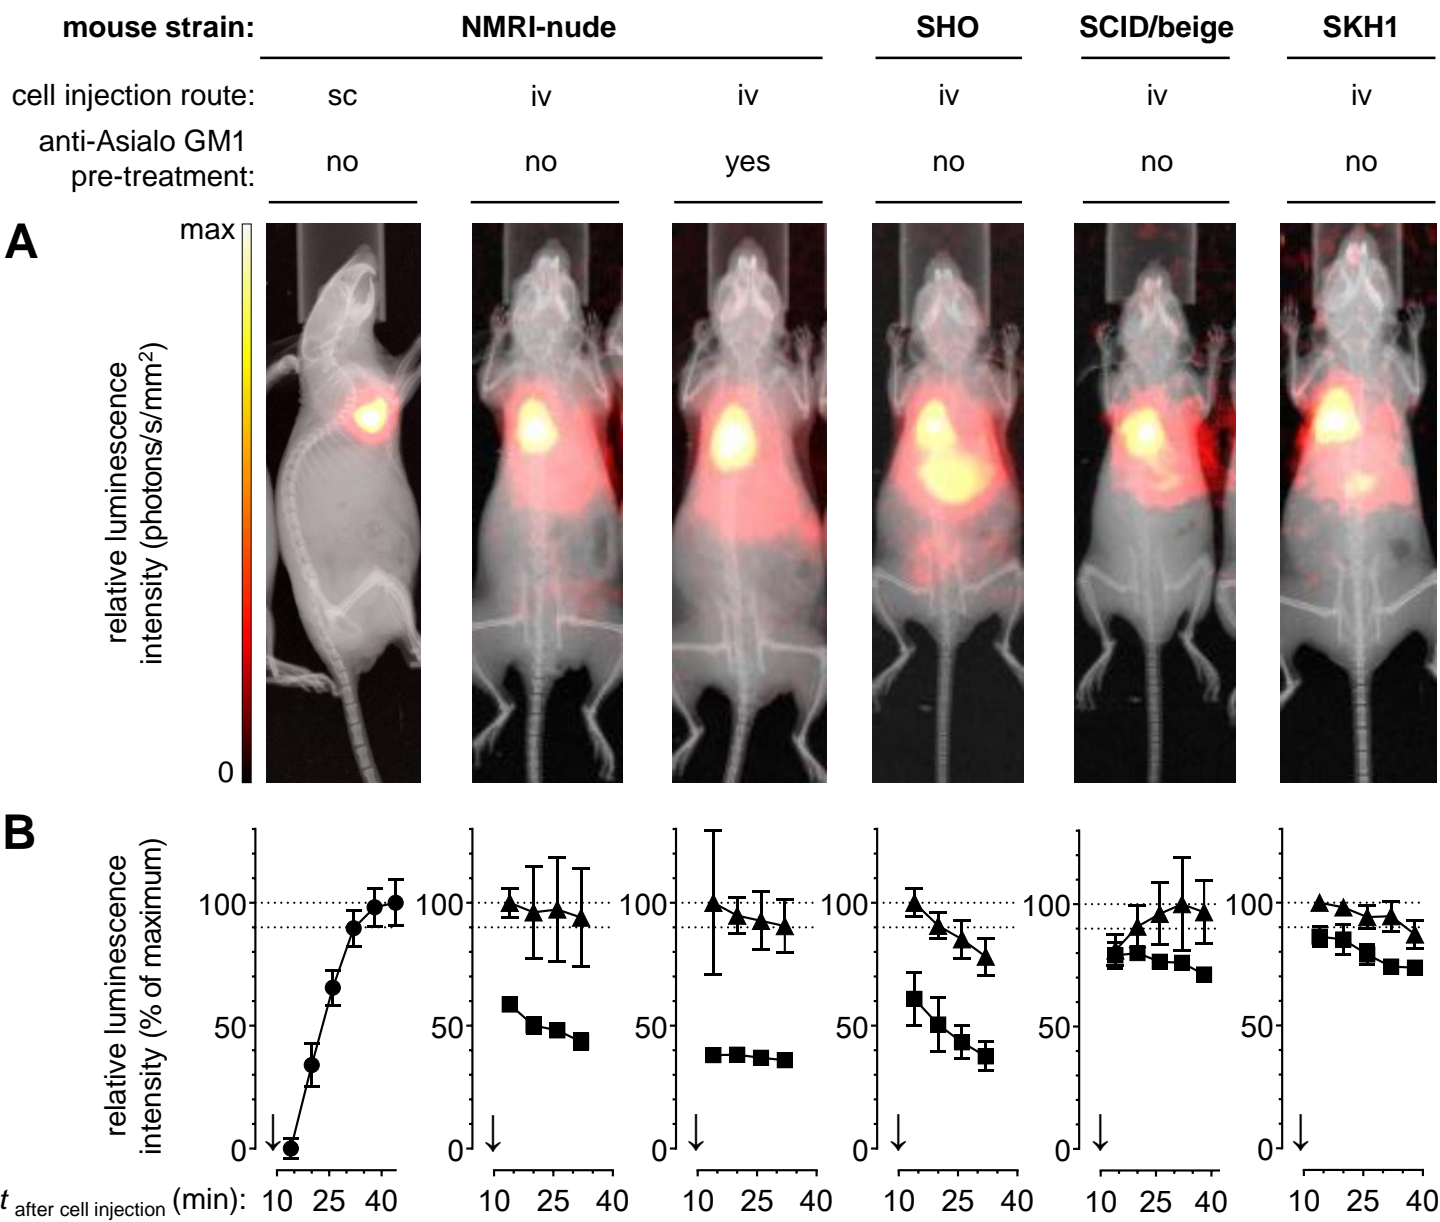

Supplemental Figure 3
