# Supplementary material for: Strain-specific metastatic phenotypes in pheochromocytoma allograft mice
Source: PubMed Central journal article supplement (PMC6176113; doi:10.1530/erc-18-0136), 2018-07-12
Supplement: erc-25-993-t001.pdf [file erc-25-993-t001.pdf]

# Strain-Specific Metastatic Phenotypes in Pheochromocytoma Allograft Mice

## Supplemental material

Martin Ullrich<sup>1</sup>, Josephine Liers<sup>1,2</sup>, Mirko Peitzsch<sup>3</sup>, Anja Feldmann<sup>4</sup>, Ralf Bergmann<sup>1</sup>, Ulrich Sommer<sup>5</sup>, Susan Richter<sup>2,3</sup>, Stefan R. Bornstein<sup>2,6</sup>, Michael Bachmann<sup>2,4,7,8</sup>, Graeme Eisenhofer<sup>2,3,6</sup>, Christian G. Ziegler<sup>6\*</sup>, and Jens Pietzsch<sup>1,9\*</sup>

<sup>1</sup> Helmholtz-Zentrum Dresden-Rossendorf, Institute of Radiopharmaceutical Cancer Research, Department of Radiopharmaceutical and Chemical Biology, Dresden, Germany

<sup>2</sup> Technische Universität Dresden, Faculty of Medicine Carl Gustav Carus, Dresden, Germany

<sup>3</sup> Technische Universität Dresden, University Hospital Carl Gustav Carus, Institute of Clinical Chemistry and Laboratory Medicine, Dresden, Germany

<sup>4</sup> Helmholtz-Zentrum Dresden-Rossendorf, Institute of Radiopharmaceutical Cancer Research, Department of Radioimmunology, Dresden, Germany

<sup>5</sup> Technische Universität Dresden, University Hospital Carl Gustav Carus, Institute of Pathology, Dresden, Germany

<sup>6</sup> Technische Universität Dresden, University Hospital Carl Gustav Carus, Department of Internal Medicine III, Dresden, Germany

<sup>7</sup> Technische Universität Dresden, University Hospital Carl Gustav Carus, Universitäts Krebs Centrum (UCC), Tumorimmunology, Dresden, Germany

<sup>8</sup> Technische Universität Dresden, National Center for Tumor Diseases (NCT), Dresden, Germany

<sup>9</sup> Technische Universität Dresden, School of Science, Faculty of Chemistry and Food Chemistry, Dresden, Germany

\* CGZ and JP shared senior authorship

*Corresponding author:*

Prof. Jens Pietzsch, PhD, MD  
Helmholtz-Zentrum Dresden-Rossendorf  
Institute of Radiopharmaceutical Cancer Research  
Dept. of Radiopharmaceutical and Chemical Biology  
Bautzner Landstraße 400, 01328 Dresden, Germany  
Phone: +49-351-2602622, Fax: +49-351-26012622  
E-mail: j.pietzsch@hzdr.de

|    |                                                                                                   |   |
|----|---------------------------------------------------------------------------------------------------|---|
| 27 | <b>Table of contents</b>                                                                          |   |
| 28 |                                                                                                   |   |
| 29 | Genetic modification of mouse pheochromocytoma cells .....                                        | 3 |
| 30 | Lentiviral vector construction .....                                                              | 3 |
| 31 | Lentiviral gene transfer .....                                                                    | 3 |
| 32 | <i>In vitro</i> characterization of reporter gene expression in MPC <sup>LUC/GZ</sup> cells ..... | 4 |
| 33 | Flow cytometry .....                                                                              | 4 |
| 34 | Confocal laser scanning microscopy .....                                                          | 4 |
| 35 | Initial MPC <sup>LUC/GZ</sup> cell distribution in mice .....                                     | 4 |
| 36 | Metastasized MPC <sup>LUC/GZ</sup> allografts in SCID/beige mice .....                            | 6 |
| 37 | Pathology.....                                                                                    | 6 |
| 38 | <i>Ex vivo</i> bioluminescence imaging .....                                                      | 6 |
| 39 | Histopathology .....                                                                              | 6 |
| 40 | Metastasized MPC <sup>LUC/GZ</sup> allografts in SKH1 mice .....                                  | 7 |
| 41 | Pathology and histopathology .....                                                                | 7 |
| 42 | Monitoring of MPC <sup>LUC/GZ</sup> allograft progression <i>in vivo</i> .....                    | 7 |
| 43 | Multimodal <i>in vivo</i> magnetic resonance/bioluminescence imaging.....                         | 7 |
| 44 | Correlation between volume and luminescence intensities of tumors .....                           | 8 |
| 45 | References .....                                                                                  | 9 |
| 46 |                                                                                                   |   |
| 47 |                                                                                                   |   |

## 48 **Genetic modification of mouse pheochromocytoma cells**

### 49 *Lentiviral vector construction*

50 The lentivector p6NST50-luc (Supplemental Figure 1) is a derivative of the previously  
51 described p6NST50-MCS, harboring a multiple cloning site (MCS) with unique 5'-*XbaI* and  
52 3'-*HpaI* restriction sites downstream of a spleen focus forming virus (SFFV-U3) promoter  
53 (Ho *et al.* 2012). The open reading frame of a firefly luciferase (*luc*) expression cassette  
54 (derived from *photinus pyralis*) was ligated into the MCS using 5'-*NheI* and 3'-*PmeI*  
55 restriction sites. For selection of successfully gene-modified cells p6NST50-luc harbors a  
56 combined enhanced green-fluorescent protein and zeocin resistance (*egfp-zeo*) expression  
57 cassette. Bicistronic expression of the selection markers downstream of the transgene stop  
58 codon is mediated by an internal ribosomal entry site (IRES) derived from the  
59 encephalomyocarditis virus.

### 60 *Lentiviral gene transfer*

61 Vesicular stomatitis virus G glycoprotein pseudotyped lentiviral particles were generated and  
62 viral titers were determined as described elsewhere (Ho *et al.* 2012; Morgenroth *et al.* 2007;  
63 Stirnnagel *et al.* 2010). Mouse pheochromocytoma (MPC) cells passage 32 were cultured for  
64 24 h, incubated with the lentiviral particles for 5 h and named MPC<sup>LUC/eGFP-ZEO</sup> cells  
65 (abbreviated MPC<sup>LUC/GZ</sup>) passage 0.

66 Although MPC<sup>LUC/GZ</sup> cells and allografts showed efficient and long-lasting luciferase  
67 expression in this study, it has been reported that the SFFV-U3 promoter is rapidly silenced  
68 by epigenetic remodeling (Warlich *et al.* 2011), an effect that has to be considered during  
69 investigations on treatments targeting epigenetics.

70

71 ***In vitro* characterization of reporter gene expression in MPC<sup>LUC/GZ</sup> cells**

72 *Flow cytometry*

73 Transgene expression was examined in detached MPC<sup>LUC/GZ</sup> cell cultures using the flow  
74 cytometry system FACSCalibur (BD Biosciences, Franklin Lakes, NJ, USA). Measurement  
75 of eGFP reporter protein biosynthesis showed that 91 % of tumor cells were positively  
76 luciferase and *egfp* gene-modified after selection with zeocin (Supplemental Figure 2 A).

77 *Confocal laser scanning microscopy*

78 Transgene expression was also examined in adherent MPC<sup>LUC/GZ</sup> cell cultures using the  
79 confocal laser scanning microscope FluoView FW1000 (Olympus, Shinjuku, Tokyo, Japan)  
80 confirming eGFP reporter protein biosynthesis in adherent cells exhibiting characteristic MPC  
81 cell line-specific growth features such as cluster formation and the outgrowth of neurite-like  
82 structures (Supplemental Figure 2 B).

83 **Initial MPC<sup>LUC/GZ</sup> cell distribution in mice**

84 *In vivo* bioluminescence imaging (BLI) showed a local accumulation of subcutaneously  
85 injected MPC<sup>LUC/GZ</sup> cells in NMRI-nude mice (reference model). Intravenous tumor cell  
86 injection into a tail vein showed a comparable distribution pattern of tumor cells in  
87 NMRI-nude, NK cell-depleted NMRI-nude, SHO, SCID/beige, and SKH1 mice,  
88 predominantly in lungs, liver, and spleen (Supplemental Figure 3 A).

89 In order to estimate the duration of MPC<sup>LUC/GZ</sup> cell accumulation in different models,  
90 dynamic BLI was performed in subgroups of three animals starting with injection of luciferin  
91 10 min after tumor cell injection, respectively. In this particular experimental setting, > 90 %

92 of the maximum luminescence intensity were detected in the subcutaneous reference model  
93 (NMRI-nude) later than 32 min after cell injection (Supplemental Figure 3 B). Among  
94 intravenously-induced models, > 90 % of the maximum luminescence intensities (strongest  
95 signals from lungs) were already detected between 14 and 32 min (NMRI-nude and NK cell-  
96 depleted NMRI-nude), between 14 and 20 min (SHO), between 20 and 32 min (SCID/beige),  
97 and between 14 and 32 min (SKH1) after cell injection.

98 Importantly, dynamic *in vivo* BLI data shown here represent a convolution of two parameters:  
99 initial distribution of tumor cells and distribution of intraperitoneally injected luciferin. Thus,  
100 dynamic BLI only allows for estimating the duration of initial tumor cell accumulation.

101 In the subcutaneous reference model, slow increase of luminescence intensity at cell injection  
102 site is most likely due to slow luciferin distribution from the abdominal cavity to distant  
103 subcutaneous tissues. In contrast, intraperitoneally delivered luciferin is much faster available  
104 to visceral organs such as lungs and liver. Interestingly, only SCID/beige mice showed  
105 increasing luminescence intensities in lungs between 14 and 32 min after cell injection,  
106 whereas luminescence intensities decreased immediately in every other metastases model.  
107 This observation may be due to prolonged survival of circulating MPC<sup>LUC/GZ</sup> cells in  
108 SCID/beige mice contributing to prolonged organ colonization. Furthermore, luminescence  
109 intensities detected in the liver tended to be higher in SCID/beige and SKH1 mice compared  
110 to the other metastases models, probably due to a less effective immune response against  
111 accumulating MPC<sup>LUC/GZ</sup> cells particularly in the liver.

112

## 113 **Metastasized MPC<sup>LUC/GZ</sup> allografts in SCID/beige mice**

### 114 *Pathology*

115 For a more detailed description of the term “*disseminated*” MPC<sup>LUC/GZ</sup> metastases in  
116 SCID/beige mice, pathologic observations were photographically documented showing a  
117 consistent pattern of multifocal metastases in liver, adrenal glands, bones, lungs, ovaries, and,  
118 rarely, also in brain and attached to the peritoneum (Supplemental Figure 4 A-H).

119

### 120 *Ex vivo bioluminescence imaging*

121 In order to verify the luciferase-expressing phenotype of MPC<sup>LUC/GZ</sup> metastases and to  
122 validate in particular the methodologic approach for identification of small metastatic lesions,  
123 BLI was performed also *ex vivo* in three SCID/beige mice. Dissected organs were incubated  
124 in the same D-Luciferin solution used for *in vivo* BLI and imaged immediately (Supplemental  
125 Figure 5 A-I). Of note, spleen and pancreas remained free from metastasis.

### 126 *Histopathology*

127 Microscopic investigations of hematoxylin-eosin-stained target organs of MPC<sup>LUC/GZ</sup>  
128 metastasis performed in three animals showed typical histopathologic features of metastasized  
129 PPGL tissue characterized by a trabecular or alveolar pattern with a distinct nest of tumor  
130 cells (“zellballen”) often surrounded by structure-supporting sustentacular cells and necrotic  
131 regions (Supplemental Figure 6 A-F) as has also been described previously in patient-derived  
132 tumor sections (Linnoila *et al.* 1990; Unger *et al.* 1991; van der Harst *et al.* 2000).

### 133 **Metastasized MPC<sup>LUC/GZ</sup> allografts in SKH1 mice**

#### 134 *Pathology and histopathology*

135 Pathologic observations in SKH1 mice were photographically documented showing that  
136 intravenous injection of MPC<sup>LUC/GZ</sup> cells was predominantly associated with multifocal liver  
137 metastases, whereas other digestive organs as well as the entire genito-urinary system  
138 remained free from metastases (Supplementary Figure 7 A-B). Microscopy of hematoxylin-  
139 eosin-stained liver sections from three animals showed that liver metastases in SKH1 mice  
140 exhibited comparable histopathology to liver metastases in SCID/beige mice (Supplemental  
141 Figure 7 C).

142

### 143 **Monitoring of MPC<sup>LUC/GZ</sup> allograft progression *in vivo***

144 In order to validate the performance of BLI for MPC<sup>LUC/GZ</sup> tumor quantification *in vivo*,  
145 correlation between volume (as determined using magnetic resonance imaging, MRI) and  
146 luminescence intensities of tumors was analyzed. These particular investigations were  
147 selectively performed in sub-cohorts of SKH1 mice bearing liver metastases ( $n = 8$ ) and  
148 compared with another sub-cohort of NMRI-nude mice bearing subcutaneous tumors ( $n = 6$ ).  
149 Both models were selected with regard to a well-defined localization of lesions allowing for  
150 most precise MRI-based measurement of tumor volume.

#### 151 *Multimodal in vivo magnetic resonance/bioluminescence imaging*

152 Optimal time frames for measuring luminescence intensities of tumors were determined from  
153 dynamic BLI measurements. Analysis of dynamic image series showed that >90 % of the  
154 maximum luminescence intensities were detectable between 11 and 25 min after luciferin

155 injection in the subcutaneous NMRI-nude reference model and between 5 and 20 min after  
156 luciferin injection in the SKH1 liver metastases model (Supplementary Figure 8 A-B).

157 In order to provide precise tumor volume measurements to be correlated with the  
158 luminescence intensities of tumors MRI was performed using the 7 Tesla BioSpin 70/30  
159 scanner (Bruker). At 17, 24, 28, and 31 days after cell injection, T2-weighted images were  
160 obtained using a commercial multi-slice multi-echo sequence with an effective echo time of  
161 21.8 ms and a repetition time of 1438 ms at a spatial resolution of  $0.2 \times 0.2 \times 0.6$  mm and a  
162 slice distance of 0.7 mm. Respiratory gating was applied using the control/gating module (SA  
163 instruments, Stony Brook, NY, USA). BLI was performed immediately after completion of  
164 the MRI scan.

#### 165 *Correlation between volume and luminescence intensities of tumors*

166 The performance of *in vivo* BLI for quantification of MPC<sup>LUC/GZ</sup> allografts was evaluated in  
167 the SKH1 liver metastases model and compared to the subcutaneous NMRI-nude reference  
168 model. In both models, correlation analyses between volume and luminescence intensity of  
169 tumors showed a significant positive linear relationship, respectively (Supplemental  
170 Figure 8 C-D).

171 These results demonstrate that the *in vivo* BLI approach performed in this study allowed for  
172 monitoring the progression of both subcutaneous and metastasized MPC<sup>LUC/GZ</sup> allografts  
173 semi-quantitatively and with comparable accuracy. This approach was based on summing  
174 the luminescence intensities from ventral and dorsal images in order to reduce absorption- and  
175 attenuation-related inaccuracy resulting from metastases localized at different tissue depths.  
176 However, only optical tomography may have the potential to overcome absorption- and  
177 attenuation-related limitations of quantitative *in vivo* BLI in the future (Darne *et al.* 2014).



178 Nevertheless, monitoring the progression of metastasized MPC<sup>LUC/GZ</sup> allografts in individual  
179 animals using *in vivo* BLI (Supplemental Figure 9) provides a fast and precise alternative to  
180 other imaging-based metastatic volume measurements such as more time-consuming MRI or  
181 radiation-exposing CT scans.

## 182 **References**

183 Darne C, Lu Y & Sevick-Muraca EM 2014 Small animal fluorescence and bioluminescence  
184 tomography: a review of approaches, algorithms and technology update. *Phys Med Biol* **59**  
185 R1-64.

186 Ho YP, Schnabel V, Swiersy A, Stirrnagel K & Lindemann D 2012 A small-molecule-  
187 controlled system for efficient pseudotyping of prototype foamy virus vectors. *Mol Ther* **20**  
188 1167-1176.

189 Linnoila RI, Keiser HR, Steinberg SM & Lack EE 1990 Histopathology of benign versus  
190 malignant sympathoadrenal paragangliomas: clinicopathologic study of 120 cases including  
191 unusual histologic features. *Hum Pathol* **21** 1168-1180.

192 Morgenroth A, Cartellieri M, Schmitz M, Gunes S, Weigle B, Bachmann M, Abken H, Rieber  
193 EP & Temme A 2007 Targeting of tumor cells expressing the prostate stem cell antigen  
194 (PSCA) using genetically engineered T-cells. *Prostate* **67** 1121-1131.

195 Stirrnagel K, Luftenegger D, Stange A, Swiersy A, Mullers E, Reh J, Stanke N, Grosse A,  
196 Chiantia S, Keller H, *et al.* 2010 Analysis of prototype foamy virus particle-host cell  
197 interaction with autofluorescent retroviral particles. *Retrovirology* **7** 45.

198 Unger P, Hoffman K, Pertsemlidis D, Thung S, Wolfe D & Kaneko M 1991 S100 protein-  
199 positive sustentacular cells in malignant and locally aggressive adrenal pheochromocytomas.  
200 *Arch Pathol Lab Med* **115** 484-487.

201 van der Harst E, Bruining HA, Jaap Bonjer H, van der Ham F, Dinjens WN, Lamberts SW, de  
202 Herder WW, Koper JW, Stijnen T, Proye C, *et al.* 2000 Proliferative index in  
203 phaeochromocytomas: does it predict the occurrence of metastases? *J Pathol* **191** 175-180.

204 Warlich E, Kuehle J, Cantz T, Brugman MH, Maetzig T, Galla M, Filipczyk AA, Halle S,  
205 Klump H, Scholer HR, *et al.* 2011 Lentiviral vector design and imaging approaches to  
206 visualize the early stages of cellular reprogramming. *Mol Ther* **19** 782-789.

207

208
